# Supplementary material
Source: Springer Nature journal article supplement (https://www.springermedizin.de/resource/supplementary/12913_2013_3139_MOESM3_ESM.pdf/9532396)

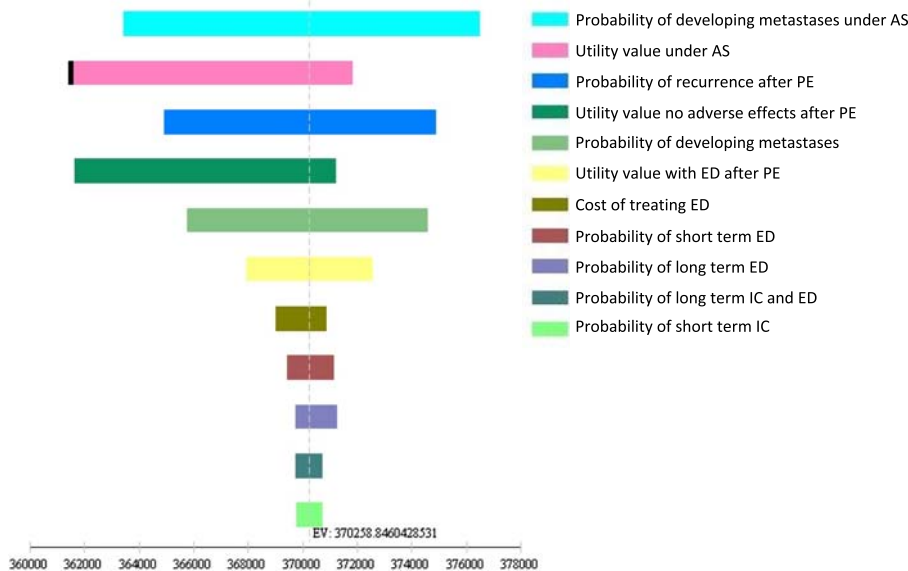

AS = Active surveillance  
 PE = Prostatectomy  
 IC = Incontinence  
 ED = Erectile Dysfunction

Supplement: MOESM3 [file 9532396]
